# Supplementary material for: Combinatorial programming of human neuronal progenitors using magnetically-guided stoichiometric mRNA delivery
Source: eLife. 2018 May 1;7:e31922. doi: 10.7554/eLife.31922 (PMC5959718; doi:10.7554/eLife.31922)
Supplement: Figure 2—source data 1. [file elife-31922-fig2-data1.xlsx]

## Sheet: Histogram
	1x										4x
	Mean Intensity per cell	Red/Green	Sorted RED/GREEN values								Mean Intensity per cell	Red/Green	Sorted RED/GREEN values
Red	21.344	0.407173	0.0642673	0.550944	0.886906	1.26707	2.44184	8.77304		Red	99.239	0.725951	0.369955	0.783905	0.992356	1.09654	1.3791
Green	52.42		0.131693	0.556652	0.898657	1.2844	2.47976	9.51893		Green	136.702		0.456149	0.786029	0.99651	1.10027	1.38612			1x					4x
	21.916	0.528657	0.157696	0.557918	0.907183	1.29518	2.50466	10.0111			99.874	0.725644	0.456617	0.795008	0.996703	1.10155	1.39978			Bins	Frequency	Error			Bins	Frequency	Error
	41.456		0.174894	0.559254	0.912043	1.30272	2.53267	11.1446			137.635		0.462058	0.795738	0.997919	1.10748	1.40579			0.015625	0	0			0.015625	0	0
	78.398	0.466966	0.182062	0.559796	0.916674	1.30907	2.56427	16.1325			66.916	0.541571	0.47016	0.819453	0.99858	1.10911	1.41533			0.03125	0	0			0.03125	0	0
	167.888		0.186089	0.569336	0.937008	1.31857	2.60205	21.7009			123.559		0.474779	0.821832	0.999545	1.10948	1.41581			0.0625	1	0			0.0625	0	0
	66.172	0.487771	0.205174	0.572263	0.937405	1.32906	2.6197	23.0962			120.008	0.624034	0.491431	0.823533	1	1.11138	1.41782			0.125	10	0.0354627			0.125	0	0
	135.662		0.209374	0.57599	0.938625	1.34281	2.64468	35.3497			192.31		0.505933	0.824147	1.00272	1.1122	1.4262			0.25	34	0.065672			0.25	7	0.0392271
	31.612	0.41527	0.226003	0.594757	0.93971	1.34663	2.65569	52.808			140.513	0.834589	0.50949	0.826216	1.00275	1.11245	1.45644			0.5	69	0.143497			0.5	100	0.116027
	76.124		0.232153	0.595089	0.946049	1.35083	2.6732	88.4789			168.362		0.511313	0.834589	1.00731	1.11327	1.46265			1	72	0.249335			1	121	0.0495378
	100.736	1.17238	0.246151	0.601199	0.949714	1.36145	2.67469	151.052			131.222	0.705688	0.511817	0.837811	1.00883	1.13081	1.47237			2	45	0.561845			2	5	0.144335
	85.924		0.266238	0.601242	0.962274	1.37833	2.77031				185.949		0.514619	0.838316	1.01059	1.13109	1.48133			4	18	1.1737			4	2	0
	36.938	0.347809	0.273001	0.609009	0.976762	1.38931	2.80409				224.319	1.38612	0.524981	0.843272	1.0119	1.13588	1.48232			8	5	1.18904			8	0	0
	106.202		0.27711	0.611107	0.994758	1.39275	2.92493				161.832		0.541571	0.848282	1.01359	1.13604	1.49354			16	3	3.68439			16	0	0
	56.998	0.656523	0.290988	0.628818	1.01164	1.41024	2.93246				206.471	1.25774	0.579299	0.863032	1.01431	1.13632	1.506			32	2	0			32	0	0
	86.818		0.298762	0.629179	1.01603	1.41067	2.95285				164.16		0.581653	0.870961	1.01569	1.13667	1.53709			64	2	0			64	0	0
	103.712	0.962274	0.299212	0.629791	1.02506	1.46912	3.05066				212.414	1.21505	0.596294	0.873336	1.01711	1.13671	1.54435
	107.778		0.32455	0.644617	1.02556	1.49261	3.11027				174.819		0.616565	0.875977	1.0175	1.14839	1.54647
	139.33	1.01603	0.337347	0.645795	1.03327	1.50469	3.16808				151.467	1.10911	0.624034	0.87843	1.01761	1.1491	1.58243
	137.132		0.34115	0.649509	1.03735	1.51227	3.18289				136.566		0.631358	0.885629	1.02637	1.15371	1.59752
	63.582	1.39275	0.347809	0.656417	1.0452	1.52302	3.21193				168.836	1.24332	0.633142	0.886984	1.0282	1.15762	1.65741
	45.652		0.355549	0.656523	1.05827	1.53791	3.24825				135.795		0.635523	0.889245	1.02867	1.15787	1.6617
	153.784	0.946049	0.362395	0.662188	1.06124	1.5859	3.43103				194.638	0.926971	0.637823	0.894171	1.03176	1.16659	1.6717
	162.554		0.367544	0.665677	1.06221	1.58862	3.48629				209.972		0.641829	0.903346	1.03278	1.17917	1.70771
	127.408	0.718617	0.374278	0.665753	1.06946	1.59127	3.54218				185.146	0.990414	0.642675	0.906469	1.03385	1.18417	1.79615
	177.296		0.375036	0.669452	1.08334	1.59892	3.59142				186.938		0.644934	0.907702	1.03513	1.19271	1.80874
	97.27	0.669452	0.375267	0.672229	1.08691	1.62002	3.6574				191.233	1.09654	0.649385	0.91171	1.04742	1.20105	1.82289
	145.298		0.389162	0.690847	1.11024	1.72355	3.68815				174.396		0.660748	0.914013	1.05037	1.20615	1.98867
	159.902	1.23252	0.39676	0.701688	1.11615	1.73311	3.74363				200.828	1.37902	0.664449	0.921913	1.05154	1.21501	2.01715
	129.736		0.397756	0.709831	1.15157	1.74435	3.87259				145.631		0.666704	0.926971	1.05251	1.21505	2.22783
	88.476	0.937405	0.405524	0.710655	1.15205	1.77447	3.98718				186.303	1.70771	0.672113	0.939282	1.053	1.22338	2.22887
	94.384		0.407173	0.718617	1.15598	1.83021	4.07205				109.095		0.679332	0.940367	1.05541	1.22397	2.29276
	76.344	0.879215	0.410888	0.749516	1.166	1.88184	4.1501				167.676	0.889245	0.704744	0.946226	1.05584	1.2245	2.41516
	86.832		0.41527	0.76812	1.16686	1.92078	4.18246				188.56		0.705688	0.949637	1.05938	1.23441	4.42862
	171.148	2.53267	0.427185	0.772466	1.17238	1.95476	4.21293				216.087	1.25882	0.712308	0.970048	1.06048	1.24332	4.63181
	67.576		0.430693	0.784447	1.1792	1.95834	4.21517				171.659		0.713961	0.970336	1.06218	1.24521
	176.168	1.1935	0.434457	0.787269	1.1816	2.00191	4.26141				158.21	0.664449	0.718081	0.971758	1.06255	1.25537
	147.606		0.444734	0.794137	1.1935	2.04653	4.30145				238.107		0.725644	0.972563	1.06358	1.25774
	77.696	0.814338	0.457006	0.806481	1.20056	2.0711	4.42698				133.046	1.09269	0.725951	0.974766	1.06684	1.25882
	95.41		0.466966	0.81039	1.23046	2.15561	4.57663				121.76		0.736606	0.975435	1.06918	1.26887
	64.188	1.49261	0.470994	0.814338	1.23252	2.17591	4.62146				150.512	1.11138	0.743715	0.975675	1.07159	1.27467
	43.004		0.474871	0.820745	1.23307	2.18764	4.85102				135.428		0.744373	0.978908	1.07192	1.27534
	156.004	1.30907	0.478622	0.820775	1.24833	2.19098	4.86378				210.825	1.22397	0.751233	0.982364	1.07596	1.2811
	119.172		0.484343	0.825049	1.25088	2.19704	4.88119				172.247		0.755895	0.982774	1.07605	1.28133
	149.369	0.938625	0.487771	0.842395	1.25185	2.21221	5.08364				206.153	1.41581	0.758839	0.984497	1.07753	1.28994
	159.136		0.50208	0.844884	1.26069	2.21954	5.15194				145.608		0.761382	0.984557	1.07792	1.31588
	182.178	0.949714	0.514531	0.851752	1.26149	2.2334	7.37071				182.521	1.02637	0.763365	0.984697	1.08175	1.31967
	191.824		0.518208	0.863503	1.26225	2.24	7.4429				177.832		0.770633	0.989978	1.08176	1.33422
	170.357	2.56427	0.527585	0.879215	1.2626	2.2419	7.56457				193.148	1.33453	0.770696	0.990414	1.08551	1.33453
	66.435		0.528657	0.880156	1.26441	2.43022	8.03009				144.731		0.775427	0.990527	1.09269	1.37902
	51.502	0.595089									178.656	1.54647
	86.545										115.525
	160.159	2.93246									133.861	1.08176
	54.616										123.744
	35.737	0.427185									138.958	0.875977
	83.657										158.632
	193.238	88.4789									111.064	0.975435
	2.184										113.861
	155.634	3.74363									189.463	0.970048
	41.573										195.313
	131.108	4.86378									186.875	1.15787
	26.956										161.396
	76.869	0.709831									183.007	1.2245
	108.292										149.455
	76.538	0.672229									121.488	0.616565
	113.857										197.04
	175.825	0.976762									105.984	0.921913
	180.008										114.961
	122.512	4.21293									89.63	0.524981
	29.08										170.73
	144.308	2.77031									186.343	0.978908
	52.091										190.358
	150.487	2.47976									187.071	1.46265
	60.686										127.899
	87.052	4.57663									38.129	0.369955
	19.021										103.064
	176.604	1.02556									102.079	0.474779
	172.202										215.003
	155.432	151.052									121.408	0.514619
	1.029										235.918
	49.765	0.645795									140.814	0.635523
	77.06										221.572
	52.296	1.26441									212.911	1.47237
	41.36										144.604
	29.978	0.337347									141.37	0.870961
	88.864										162.315
	94.966	0.430693									134.805	1.08175
	220.496										124.618
	142.61	1.06221									205.415	0.971758
	134.258										211.385
	85.672	1.15157									202.6	1.26887
	74.396										159.67
	19.443	0.246151									141.033	0.641829
	78.988										219.736
	91.934	2.95285									115.425	0.649385
	31.134										177.745
	158.295	0.656417									248.394	1.41782
	241.15										175.194
	22.428	0.32455									172.591	0.679332
	69.105										254.06
	237.94	2.0711									200.429	1.23441
	114.886										162.368
	160.073	3.11027									252.768	1.15762
	51.466										218.352
	238.118	1.88184									114.114	0.644934
	126.535										176.939
	92.192	3.21193									254.281	1.6617
	28.703										153.025
	204.199	0.994758									119.94	0.50949
	205.275										235.412
	91.994	0.478622									220.639	1.00883
	192.206										218.708
	101.036	0.628818									167.721	0.755895
	160.676										221.884
	30.462	0.470994									130.493	0.596294
	64.676										218.84
	16.485	0.362395									130.053	0.984497
	45.489										132.101
	194.813	1.02506									222.224	1.20615
	190.05										184.242
	84.48	0.844884									193.829	1.65741
	99.99										116.947
	77.208	1.15205									157.046	4.63181
	67.018										33.906
	19.926	0.226003									190.695	1.48133
	88.167										128.732
	71.589	1.95476									193.997	1.24521
	36.623										155.795
	107.757	11.1446									216.316	1.05154
	9.669										205.714
	106.662	0.907183									189.389	1.33422
	117.575										141.947
	89.538	0.912043									215.227	1.07792
	98.173										199.669
	70.9	1.72355									195.635	1.10948
	41.136										176.331
	181.526	2.18764									161.069	4.42862
	82.978										36.37
	122.673	0.665753									106.165	1.1122
	184.262										95.455
	95.4	0.484343									143.409	0.579299
	196.968										247.556
	55.685	23.0962									123.433	0.511313
	2.411										241.404
	53.475	0.410888									157.294	0.795008
	130.145										197.852
	67.454	1.06946									181.487	0.823533
	63.073										220.376
	18.274	0.375036									114.145	1.11327
	48.726										102.531
	52.169	21.7009									158.658	1.22338
	2.404										129.688
	109.435	0.629791									157.407	1.07605
	173.764										146.282
	185.048	2.17591									100.047	0.456617
	85.044										219.105
	172.045	1.51227									243.671	1.21501
	113.766										200.551
	93.438	0.527585									205.426	1.80874
	177.105										113.574
	194.723	1.23307									134.235	0.949637
	157.917										141.354
	175.535	1.31857									226.887	1.31588
	133.125										172.422
	52.195	0.39676									136.382	0.581653
	131.553										234.473
	77.887	2.67469									98.359	0.456149
	29.12										215.629
	169.931	1.50469									166.601	0.946226
	112.934										176.069
	166.207	1.5859									158.183	1.01059
	104.803										156.526
	228.863	3.59142									255	1
	63.725										255
	188.416	2.65569									139.745	0.637823
	70.948										219.097
	14.606	0.50208									186.357	1.2811
	29.091										145.466
	51.817	0.772466									208.068	0.843272
	67.08										246.739
	221.477	3.16808									255	1.02867
	69.909										247.894
	81.386	1.77447									252.294	0.989978
	45.865										254.848
	49.661	1.59892									77.039	0.462058
	31.059										166.73
	118.38	2.6732									129.917	0.795738
	44.284										163.266
	58.849	0.514531									230.077	0.907702
	114.374										253.472
	17.092	0.389162									252.079	1.01569
	43.92										248.186
	14.884	0.572263									209.443	1.41533
	26.009										147.982
	22.479	0.367544									69.302	0.47016
	61.16										147.401
	104.015	2.6197									240.175	0.992356
	39.705										242.025
	70.728	0.569336									204.306	1.03385
	124.229										197.617
	78.441	35.3497									190.167	1.03278
	2.219										184.132
	153.896	2.21954									180.865	1.08551
	69.337										166.618
	34.378	52.808									254.884	0.999545
	0.651										255
	152.997	1.74435									189.622	0.743715
	87.71										254.966
	75.351	0.550944									254.11	0.99651
	136.767										255
	97.418	2.60205									231.108	0.906469
	37.439										254.954
	134.991	0.629179									189.419	0.744373
	214.551										254.468
	183.256	1.73311									219.814	0.885629
	105.738										248.201
	78.24	1.11024									155.175	0.990527
	70.471										156.659
	40.789	4.62146									165.999	1.48232
	8.826										111.986
	144.486	3.48629									254.696	1.053
	41.444										241.876
	155.634	1.41024									164.352	1.01761
	110.36										161.508
	30.318	0.34115									138.234	0.763365
	88.87										181.085
	182.459	2.2419									202.604	2.22887
	81.386										90.9
	74.826	1.03735									207.532	2.41516
	72.132										85.929
	112.246	3.43103									224.596	1.20105
	32.715										187
	86.626	10.0111									236.907	1.13671
	8.653										208.414
	143.715	4.07205									220.061	0.863032
	35.293										254.986
	202.124	3.54218									141.514	1.13604
	57.062										124.568
	141.463	2.19098									241.63	1.11245
	64.566										217.205
	217.767	1.34663									214.67	1.3791
	161.713										155.659
	130.525	2.21221									221.548	1.10155
	59.002										201.123
	31.496	0.644617									129.216	1.13109
	48.86										114.24
	35.256	0.690847									197.502	2.22783
	51.033										88.652
	67.395	0.556652									206.668	1.53709
	121.072										134.454
	150.851	2.19704									134.954	1.06918
	68.661										126.222
	142.093	1.95834									157.872	0.848282
	72.558										186.108
	117.432	8.03009									124.679	0.713961
	14.624										174.63
	84.163	2.44184									151.187	1.10748
	34.467										136.515
	79.919	0.851752									186.046	2.29276
	93.829										81.145
	71.886	0.76812									255	1.00275
	93.587										254.3
	41.295	7.56457									228.667	1.13667
	5.459										201.172
	24.417	0.355549									213.54	1.25537
	68.674										170.101
	61.771	8.77304									95.949	1.0119
	7.041										94.821
	46.262	9.51893									203.723	1.27467
	4.86										159.824
	83.742	1.16686									207.806	0.91171
	71.767										227.93
	35.304	0.273001									206.705	0.940367
	129.318										219.813
	35.442	0.601242									123.049	0.712308
	58.948										172.747
	42.886	0.559796									148.158	1.05541
	76.61										140.379
	18.132	1.23046									176.828	1.03176
	14.736										171.385
	15.872	0.434457									244.051	1.01431
	36.533										240.608
	118.031	0.916674									129.857	0.770633
	128.76										168.507
	120.283	0.880156									124.969	0.666704
	136.661										187.443
	98.818	4.1501									201.405	1.39978
	23.811										143.883
	118.067	0.825049									150.535	0.975675
	143.103										154.288
	191.975	1.26225									187.614	1.06684
	152.089										175.859
	194.19	1.20056									126.192	1.16659
	161.749										108.172
	68.933	5.15194									255	1.13081
	13.38										225.502
	58.288	0.665677									231.128	1.07596
	87.562										214.81
	52.577	0.609009									146.555	1.0175
	86.332										144.035
	103.148	0.886906									120.081	0.633142
	116.301										189.659
	174.057	1.06124									138.597	0.672113
	164.013										206.211
	164.204	0.701688									253.026	0.996703
	234.013										253.863
	106.179	1.59127									233.507	1.07753
	66.726										216.705
	47.323	0.457006									205.65	1.58243
	103.55										129.958
	42.11	0.374278									184.627	0.824147
	112.51										224.022
	51.341	0.405524									229.167	1.05584
	126.604										217.047
	110.805	0.93971									120.489	0.631358
	117.914										190.841
	21.76	0.298762									235.748	1.05251
	72.834										223.986
	92.136	0.937008									237.913	1.79615
	98.33										132.457
	47.75	0.290988									220.993	1.28133
	164.096										172.471
	21.994	0.174894									185.178	0.783905
	125.756										236.225
	40.093	0.182062									248.424	0.997919
	220.216										248.942
	39.299	0.205174									212.373	0.838316
	191.54										253.333
	87.889	1.15598									254.638	0.99858
	76.03										255
	103.432	1.24833									167.321	0.914013
	82.856										183.062
	170.18	1.08691									250.957	0.984697
	156.573										254.857
	95.335	1.52302									152.611	0.642675
	62.596										237.462
	137.104	1.0452									98.399	0.786029
	131.175										125.185
	117.948	2.92493									253.5	1.27534
	40.325										198.77
	84.862	0.898657									246.303	1.4262
	94.432										172.699
	77.179	0.863503									148.168	0.972563
	89.379										152.348
	38.615	0.820775									183.906	0.894171
	47.047										205.672
	136.566	3.05066									237.538	1.03513
	44.766										229.476
	118.811	4.18246									172.705	1.04742
	28.407										164.886
	91.916	3.68815									192.83	1.31967
	24.922										146.12
	41.267	0.27711									181.92	0.751233
	148.919										242.162
	17.001	0.131693									245.189	1.17917
	129.096										207.933
	128.349	1.58862									255	1.01359
	80.793										251.582
	19.424	0.209374									199.222	2.01715
	92.772										98.764
	103.902	0.662188									241.702	1.506
	156.907										160.493
	80.156	0.601199									201.029	1.06218
	133.327										189.26
	109.029	1.01164									193.651	1.13632
	107.775										170.419
	164.393	1.41067									206.395	1.10027
	116.535										187.586
	216.337	1.26069									237.595	1.05938
	171.602										224.277
	147.775	1.62002									93.717	0.505933
	91.218										185.236
	164.905	3.6574									101.454	1.07159
	45.088										94.676
	92.378	1.26149									209.357	1.98867
	73.229										105.275
	170.28	3.24825									209.788	1.1491
	52.422										182.567
	95.34	1.46912									103.339	0.511817
	64.896										201.906
	124.121	1.1792									76.954	0.87843
	105.259										87.604
	104.096	1.32906									167.852	0.761382
	78.323										220.457
	32.478	0.299212									168.915	0.770696
	108.545										219.172
	105.65	0.611107									198.765	1.19271
	172.883										166.65
	99.184	1.05827									225.538	0.970336
	93.723										232.433
	183.358	1.34281									240.674	1.45644
	136.548										165.248
	160.67	1.26707									174.575	1.14839
	126.804										152.017
	132.113	1.2626									188.359	0.974766
	104.636										193.235
	88.062	2.00191									139.071	1.01711
	43.989										136.732
	111.589	3.18289									185.701	1.82289
	35.059										101.872
	93.606	2.80409									250.171	0.982774
	33.382										254.556
	99.49	2.50466									158.826	0.826216
	39.722										192.233
	133.022	1.166									156.13	0.775427
	114.084										201.347
	174.273	1.53791									190.86	1.00731
	113.318										189.474
	98.001	1.11615									145.014	1.18417
	87.803										122.46
	22	0.186089									170.754	1.28994
	118.223										132.374
	71.807	0.820745									173.632	1.06255
	87.49										163.411
	77.312	2.64468									239.517	0.939282
	29.233										255
	136.286	1.08334									195.094	1.15371
	125.802										169.101
	118.428	1.03327									226.181	0.886984
	114.615										255
	66.725	0.806481									226.86	1.06358
	82.736										213.298
	159.591	1.36145									105.31	0.660748
	117.221										159.38
	223.576	1.35083									208.92	1.0282
	165.51										203.191
	186.226	1.38931									232.004	0.984557
	134.042										235.643
	94.14	0.594757									239.29	1.13588
	158.283										210.665
	44.345	0.397756									169.292	1.40579
	111.488										120.425
	37.816	0.794137									254.992	1.00272
	47.619										254.3
	59.89	0.559254									247.327	1.54435
	107.089										160.15
	38.408	0.518208									233.77	1.59752
	74.117										146.333
	191.606	1.37833									236.731	0.982364
	139.013										240.981
	54.185	0.232153									233.805	1.06048
	233.402										220.47
	60.627	0.266238									230.242	0.903346
	227.717										254.877
	231.097	1.29518									208.123	0.819453
	178.428										253.978
	225.864	1.92078									195.22	1.07192
	117.59										182.121
	85.886	0.784447									182.55	0.758839
	109.486										240.565
	61.548	0.57599									184.086	1.05037
	106.856										175.259
	198.538	2.2334									208.346	0.837811
	88.895										248.679
	37.6	0.157696									218.995	0.873336
	238.434										250.757
	14.271	0.0642673									241.987	1.49354
	222.057										162.022
	92.847	1.25185									176.15	0.704744
	74.168										249.949
	212.767	1.83021									194.189	0.821832
	116.253										236.288
	185.512	2.24									218.417	1.6717
	82.818										130.656
	166.402	2.15561									164.562	0.718081
	77.195										229.169
	210.296	3.98718									88.402	0.491431
	52.743										179.887
	151.793	2.04653									106.458	0.736606
	74.171										144.525
	167.86	1.2844
	130.691
	90.295	0.787269
	114.694
	141.769	1.30272
	108.825
	85.948	4.88119
	17.608
	88.33	0.649509
	135.995
	77.83	0.474871
	163.897
	100.744	4.26141
	23.641
	151.79	3.87259
	39.196
	181.458	16.1325
	11.248
	49.964	0.710655
	70.307
	72.04	0.557918
	129.123
	119.064	7.4429
	15.997
	107.255	4.21517
	25.445
	99.288	0.842395
	117.864
	57.658	0.749516
	76.927
	15.708	0.444734
	35.32
	83.633	4.30145
	19.443
	80.479	0.81039
	99.309
	72.93	4.42698
	16.474
	64.73	5.08364
	12.733
	174.485	1.25088
	139.49
	195.341	2.43022
	80.38
	124.758	1.1816
	105.584
	88.817	7.37071
	12.05
	165.512	4.85102
	34.119
	46.523	0.375267
	123.973

## Sheet: Error Bars
1x	Sorted RED/GREEN values						1x												4x	Sorted RED/GREEN values					4x
Red	0.0642673	0.550944	0.886906	1.26707	2.44184	8.77304	Bin	Frequency												0.369955	0.783905	0.992356	1.09654	1.3791	Bin	Frequency
Green	0.131693	0.556652	0.898657	1.2844	2.47976	9.51893	0.015625	0												0.456149	0.786029	0.99651	1.10027	1.38612	0.015625	0
	0.157696	0.557918	0.907183	1.29518	2.50466	10.0111	0.03125	0												0.456617	0.795008	0.996703	1.10155	1.39978	0.03125	0
	0.174894	0.559254	0.912043	1.30272	2.53267	11.1446	0.0625	1												0.462058	0.795738	0.997919	1.10748	1.40579	0.0625	0
	0.182062	0.559796	0.916674	1.30907	2.56427	16.1325	0.125	10												0.47016	0.819453	0.99858	1.10911	1.41533	0.125	0
	0.186089	0.569336	0.937008	1.31857	2.60205	21.7009	0.25	34												0.474779	0.821832	0.999545	1.10948	1.41581	0.25	7
	0.205174	0.572263	0.937405	1.32906	2.6197	23.0962	0.5	69												0.491431	0.823533	1	1.11138	1.41782	0.5	100
	0.209374	0.57599	0.938625	1.34281	2.64468	35.3497	1	72				Error calculation for 1x transfected cells based on Sum of Error of Means (SEM)								0.505933	0.824147	1.00272	1.1122	1.4262	1	121			Error calculation for 4x transfected cells based on Sum of Error of Means (SEM)
	0.226003	0.594757	0.93971	1.34663	2.65569	52.808	2	45												0.50949	0.826216	1.00275	1.11245	1.45644	2	5
	0.232153	0.595089	0.946049	1.35083	2.6732	88.4789	4	18												0.511313	0.834589	1.00731	1.11327	1.46265	4	2
	0.246151	0.601199	0.949714	1.36145	2.67469	151.052	8	5												0.511817	0.837811	1.00883	1.13081	1.47237	8	0
	0.266238	0.601242	0.962274	1.37833	2.77031		16	3												0.514619	0.838316	1.01059	1.13109	1.48133	16	0
	0.273001	0.609009	0.976762	1.38931	2.80409		32	2		0.0112143	0.0112626	0.017275	0.0293844	0.083755	0.276643	0.531754	2.12718	STDV		0.524981	0.843272	1.0119	1.13588	1.48232	32	0			0.00672739	0.0139681	0.00583809	0.0215162	STDV
	0.27711	0.611107	0.994758	1.39275	2.92493		64	2		0.0354627	0.065672	0.143497	0.249335	0.561845	1.1737	1.18904	3.68439	SEM		0.541571	0.848282	1.01359	1.13604	1.49354	64	0			0.0392271	0.116027	0.0495378	0.144335	SEM
	0.290988	0.628818	1.01164	1.41024	2.93246															0.579299	0.863032	1.01431	1.13632	1.506
	0.298762	0.629179	1.01603	1.41067	2.95285					Bin										0.581653	0.870961	1.01569	1.13667	1.53709
	0.299212	0.629791	1.02506	1.46912	3.05066					0.125	0.25	0.5	1	2	4	8	16			0.596294	0.873336	1.01711	1.13671	1.54435					0.25	0.5	1	2
	0.32455	0.644617	1.02556	1.49261	3.11027				1	0.131693	0.266238	0.50208	1.01164	2.00191	4.07205	8.03009	16.1325			0.616565	0.875977	1.0175	1.14839	1.54647					0.369955	0.505933	0.99651	2.01715
	0.337347	0.645795	1.03327	1.50469	3.16808				2	0.157696	0.273001	0.514531	1.01603	2.04653	4.1501	8.77304	21.7009			0.624034	0.87843	1.01761	1.1491	1.58243					0.456149	0.50949	0.996703	2.22783
	0.34115	0.649509	1.03735	1.51227	3.18289				3	0.174894	0.27711	0.518208	1.02506	2.0711	4.18246	9.51893	23.0962			0.631358	0.885629	1.02637	1.15371	1.59752					0.456617	0.511313	0.997919	2.22887
	0.347809	0.656417	1.0452	1.52302	3.21193				4	0.182062	0.290988	0.527585	1.02556	2.15561	4.21293	10.0111				0.633142	0.886984	1.0282	1.15762	1.65741					0.462058	0.511817	0.99858	2.29276
	0.355549	0.656523	1.05827	1.53791	3.24825				5	0.186089	0.298762	0.528657	1.03327	2.17591	4.21517	11.1446				0.635523	0.889245	1.02867	1.15787	1.6617					0.47016	0.514619	0.999545	2.41516
	0.362395	0.662188	1.06124	1.5859	3.43103				6	0.205174	0.299212	0.550944	1.03735	2.18764	4.26141					0.637823	0.894171	1.03176	1.16659	1.6717					0.474779	0.524981	1
	0.367544	0.665677	1.06221	1.58862	3.48629				7	0.209374	0.32455	0.556652	1.0452	2.19098	4.30145					0.641829	0.903346	1.03278	1.17917	1.70771					0.491431	0.541571	1.00272
	0.374278	0.665753	1.06946	1.59127	3.54218				8	0.226003	0.337347	0.557918	1.05827	2.19704	4.42698					0.642675	0.906469	1.03385	1.18417	1.79615						0.579299	1.00275
	0.375036	0.669452	1.08334	1.59892	3.59142				9	0.232153	0.34115	0.559254	1.06124	2.21221	4.57663					0.644934	0.907702	1.03513	1.19271	1.80874						0.581653	1.00731
	0.375267	0.672229	1.08691	1.62002	3.6574				10	0.246151	0.347809	0.559796	1.06221	2.21954	4.62146					0.649385	0.91171	1.04742	1.20105	1.82289						0.596294	1.00883
	0.389162	0.690847	1.11024	1.72355	3.68815				11		0.355549	0.569336	1.06946	2.2334	4.85102					0.660748	0.914013	1.05037	1.20615	1.98867						0.616565	1.01059
	0.39676	0.701688	1.11615	1.73311	3.74363				12		0.362395	0.572263	1.08334	2.24	4.86378					0.664449	0.921913	1.05154	1.21501	2.01715						0.624034	1.0119
	0.397756	0.709831	1.15157	1.74435	3.87259				13		0.367544	0.57599	1.08691	2.2419	4.88119					0.666704	0.926971	1.05251	1.21505	2.22783						0.631358	1.01359
	0.405524	0.710655	1.15205	1.77447	3.98718				14		0.374278	0.594757	1.11024	2.43022	5.08364					0.672113	0.939282	1.053	1.22338	2.22887						0.633142	1.01431
	0.407173	0.718617	1.15598	1.83021	4.07205				15		0.375036	0.595089	1.11615	2.44184	5.15194					0.679332	0.940367	1.05541	1.22397	2.29276						0.635523	1.01569
	0.410888	0.749516	1.166	1.88184	4.1501				16		0.375267	0.601199	1.15157	2.47976	7.37071					0.704744	0.946226	1.05584	1.2245	2.41516						0.637823	1.01711
	0.41527	0.76812	1.16686	1.92078	4.18246				17		0.389162	0.601242	1.15205	2.50466	7.4429					0.705688	0.949637	1.05938	1.23441	4.42862						0.641829	1.0175
	0.427185	0.772466	1.17238	1.95476	4.21293				18		0.39676	0.609009	1.15598	2.53267	7.56457					0.712308	0.970048	1.06048	1.24332	4.63181						0.642675	1.01761
	0.430693	0.784447	1.1792	1.95834	4.21517				19		0.397756	0.611107	1.166	2.56427						0.713961	0.970336	1.06218	1.24521							0.644934	1.02637
	0.434457	0.787269	1.1816	2.00191	4.26141				20		0.405524	0.628818	1.16686	2.60205						0.718081	0.971758	1.06255	1.25537							0.649385	1.0282
	0.444734	0.794137	1.1935	2.04653	4.30145				21		0.407173	0.629179	1.17238	2.6197						0.725644	0.972563	1.06358	1.25774							0.660748	1.02867
	0.457006	0.806481	1.20056	2.0711	4.42698				22		0.410888	0.629791	1.1792	2.64468						0.725951	0.974766	1.06684	1.25882							0.664449	1.03176
	0.466966	0.81039	1.23046	2.15561	4.57663				23		0.41527	0.644617	1.1816	2.65569						0.736606	0.975435	1.06918	1.26887							0.666704	1.03278
	0.470994	0.814338	1.23252	2.17591	4.62146				24		0.427185	0.645795	1.1935	2.6732						0.743715	0.975675	1.07159	1.27467							0.672113	1.03385
	0.474871	0.820745	1.23307	2.18764	4.85102				25		0.430693	0.649509	1.20056	2.67469						0.744373	0.978908	1.07192	1.27534							0.679332	1.03513
	0.478622	0.820775	1.24833	2.19098	4.86378				26		0.434457	0.656417	1.23046	2.77031						0.751233	0.982364	1.07596	1.2811							0.704744	1.04742
	0.484343	0.825049	1.25088	2.19704	4.88119				27		0.444734	0.656523	1.23252	2.80409						0.755895	0.982774	1.07605	1.28133							0.705688	1.05037
	0.487771	0.842395	1.25185	2.21221	5.08364				28		0.457006	0.662188	1.23307	2.92493						0.758839	0.984497	1.07753	1.28994							0.712308	1.05154
	0.50208	0.844884	1.26069	2.21954	5.15194				29		0.466966	0.665677	1.24833	2.93246						0.761382	0.984557	1.07792	1.31588							0.713961	1.05251
	0.514531	0.851752	1.26149	2.2334	7.37071				30		0.470994	0.665753	1.25088	2.95285						0.763365	0.984697	1.08175	1.31967							0.718081	1.053
	0.518208	0.863503	1.26225	2.24	7.4429				31		0.474871	0.669452	1.25185	3.05066						0.770633	0.989978	1.08176	1.33422							0.725644	1.05541
	0.527585	0.879215	1.2626	2.2419	7.56457				32		0.478622	0.672229	1.26069	3.11027						0.770696	0.990414	1.08551	1.33453							0.725951	1.05584
	0.528657	0.880156	1.26441	2.43022	8.03009				33		0.484343	0.690847	1.26149	3.16808						0.775427	0.990527	1.09269	1.37902							0.736606	1.05938
									34		0.487771	0.701688	1.26225	3.18289																0.743715	1.06048
									35			0.709831	1.2626	3.21193																0.744373	1.06218
									36			0.710655	1.26441	3.24825																0.751233	1.06255
									37			0.718617	1.26707	3.43103																0.755895	1.06358
									38			0.749516	1.2844	3.48629																0.758839	1.06684
									39			0.76812	1.29518	3.54218																0.761382	1.06918
									40			0.772466	1.30272	3.59142																0.763365	1.07159
									41			0.784447	1.30907	3.6574																0.770633	1.07192
									42			0.787269	1.31857	3.68815																0.770696	1.07596
									43			0.794137	1.32906	3.74363																0.775427	1.07605
									44			0.806481	1.34281	3.87259																0.783905	1.07753
									45			0.81039	1.34663	3.98718																0.786029	1.07792
									46			0.814338	1.35083																	0.795008	1.08175
									47			0.820745	1.36145																	0.795738	1.08176
									48			0.820775	1.37833																	0.819453	1.08551
									49			0.825049	1.38931																	0.821832	1.09269
									50			0.842395	1.39275																	0.823533	1.09654
									51			0.844884	1.41024																	0.824147	1.10027
									52			0.851752	1.41067																	0.826216	1.10155
									53			0.863503	1.46912																	0.834589	1.10748
									54			0.879215	1.49261																	0.837811	1.10911
									55			0.880156	1.50469																	0.838316	1.10948
									56			0.886906	1.51227																	0.843272	1.11138
									57			0.898657	1.52302																	0.848282	1.1122
									58			0.907183	1.53791																	0.863032	1.11245
									59			0.912043	1.5859																	0.870961	1.11327
									60			0.916674	1.58862																	0.873336	1.13081
									61			0.937008	1.59127																	0.875977	1.13109
									62			0.937405	1.59892																	0.87843	1.13588
									63			0.938625	1.62002																	0.885629	1.13604
									64			0.93971	1.72355																	0.886984	1.13632
									65			0.946049	1.73311																	0.889245	1.13667
									66			0.949714	1.74435																	0.894171	1.13671
									67			0.962274	1.77447																	0.903346	1.14839
									68			0.976762	1.83021																	0.906469	1.1491
									69			0.994758	1.88184																	0.907702	1.15371
									70				1.92078																	0.91171	1.15762
									71				1.95476																	0.914013	1.15787
									72				1.95834																	0.921913	1.16659
																														0.926971	1.17917
																														0.939282	1.18417
																														0.940367	1.19271
																														0.946226	1.20105
																														0.949637	1.20615
																														0.970048	1.21501
																														0.970336	1.21505
																														0.971758	1.22338
																														0.972563	1.22397
																														0.974766	1.2245
																														0.975435	1.23441
																														0.975675	1.24332
																														0.978908	1.24521
																														0.982364	1.25537
																														0.982774	1.25774
																														0.984497	1.25882
																														0.984557	1.26887
																														0.984697	1.27467
																														0.989978	1.27534
																														0.990414	1.2811
																														0.990527	1.28133
																														0.992356	1.28994
																															1.31588
																															1.31967
																															1.33422
																															1.33453
																															1.37902
																															1.3791
																															1.38612
																															1.39978
																															1.40579
																															1.41533
																															1.41581
																															1.41782
																															1.4262
																															1.45644
																															1.46265
																															1.47237
																															1.48133
																															1.48232
																															1.49354
																															1.506
																															1.53709
																															1.54435
																															1.54647
																															1.58243
																															1.59752
																															1.65741
																															1.6617
																															1.6717
																															1.70771
																															1.79615
																															1.80874
																															1.82289
																															1.98867
