# Supplementary material for: Combinatorial programming of human neuronal progenitors using magnetically-guided stoichiometric mRNA delivery
Source: eLife. 2018 May 1;7:e31922. doi: 10.7554/eLife.31922 (PMC5959718; doi:10.7554/eLife.31922)
Supplement: Figure 3—source data 1. [file elife-31922-fig3-data1.xlsx]

## Sheet: Sheet1
		OTX2 (M)	OTX2 (P)	LMX1A (M)	LMX1A (P)	FOXA2 (M)	FOXA2 (P)	ASCL1 (M)	ASCL1 (P)	NGN2 (M)	NGN2 (P)	NURR1 (M)	NURR1 (P)	PITX3 (M)	PITX3 (P)	YFP1	F-L	P-L	FP	FP-L
	TH1-1	27.57	27.75	25.9	25.68	26.85	27.03	28.91	28.52	28.12	27.77	27.54	27.41	26.06	27.15	27.45	25.6	25.24	25.69	24.8
	TH1-2	27.47	27.69	25.8	25.53	26.76	27.22	28.85	28.38	27.98	27.67	27.61	27.43	26	26.84	27.26	25.64	25.08	25.71	25.03
	TH1-3	27.36	27.94	25.77	25.44	26.61	27.32	28.83	28.3	28.24	27.61	27.44	27.49	25.93	27.24	27.42	25.51	24.97	25.62	25.11
	TH2-1	26.44	26.5	25.8	25.53	26.51	29.11	28.1	28.38	27.09	27.03	27.32	27.43	26	28.19	27.26	25.52	25.08	25.71	24.33
	TH2-2	26.42	26.69	25.74	25.42	26.47	29.04	28.15	28.32	26.96	27.07	27.49	27.32	26.16	28.14	27.12	25.47	24.93	25.53	24.5
	TH2-3	26.51	26.69	25.89	25.32	26.4	28.94	28.22	28.24	26.92	26.91	27.41	27.24	26.26	28.31	26.93	25.33	24.98	25.44	24.41
	TH3-1	29.66	30.51	27.7	27.1	27.86	29.61	31	31.12	30.34	29.6	29.31	28.64	27.59	29.74	28.81	26.89	26.71	26.96	26.21
	TH3-2	29.42	30.42	27.22	27.1	27.75	29.74	29.9	29.96	30.16	29.44	29.24	28.77	27.79	29.84	28.72	26.83	26.64	26.81	26.11
	TH3-3	29.33	30.66	27.47	26.94	27.92	29.5	29.83	29.9	30.41	29.51	29.16	28.98	27.71	29.93	28.63	26.71	26.52	26.72	26.33
	GAP1	19.27	19.23	19.01	19.12	19.47	19.43	19.42	19.4	19.21	19.27	19.49	19.48	19.61	19.36	19.08	19.5	19.39	19.51	19.58
	GAP2	18.9	18.91	18.9	19.19	19.41	19.3	19.33	19.18	19.07	19.09	19.37	19.26	19.21	19.34	19.02	19.33	19.38	19.24	19.29
	GAP3	19.6	19.68	19.58	19.67	19.56	19.48	19.64	19.72	19.58	19.43	19.78	19.81	19.61	19.53	19.7	19.67	19.66	19.77	19.74
	ΔTH1-1	-8.3	-8.52	-6.89	-6.56	-7.38	-7.6	-9.49	-9.12	-8.91	-8.5	-8.05	-7.93	-6.45	-7.79	-8.37	-6.1	-5.85	-6.18	-5.22
	ΔTH1-2	-8.2	-8.46	-6.79	-6.41	-7.29	-7.79	-9.43	-8.98	-8.77	-8.4	-8.12	-7.95	-6.39	-7.48	-8.18	-6.14	-5.69	-6.2	-5.45
	ΔTH1-3	-8.09	-8.71	-6.76	-6.32	-7.14	-7.89	-9.41	-8.9	-9.03	-8.34	-7.95	-8.01	-6.32	-7.88	-8.34	-6.01	-5.58	-6.11	-5.53
	ΔTH2-1	-7.54	-7.59	-6.9	-6.34	-7.1	-9.81	-8.77	-9.2	-8.02	-7.94	-7.95	-8.17	-6.79	-8.85	-8.24	-6.19	-5.7	-6.47	-5.04
	ΔTH2-2	-7.52	-7.78	-6.84	-6.23	-7.06	-9.74	-8.82	-9.14	-7.89	-7.98	-8.12	-8.06	-6.95	-8.8	-8.1	-6.14	-5.55	-6.29	-5.21
	ΔTH2-3	-7.61	-7.78	-6.99	-6.13	-6.99	-9.64	-8.89	-9.06	-7.85	-7.82	-8.04	-7.98	-7.05	-8.97	-7.91	-6	-5.6	-6.2	-5.12
	ΔTH3-1	-10.06	-10.83	-8.12	-7.43	-8.3	-10.13	-11.36	-11.4	-10.76	-10.17	-9.53	-8.83	-7.98	-10.21	-9.11	-7.22	-7.05	-7.19	-6.47
	ΔTH3-2	-9.82	-10.74	-7.64	-7.43	-8.19	-10.26	-10.26	-10.24	-10.58	-10.01	-9.46	-8.96	-8.18	-10.31	-9.02	-7.16	-6.98	-7.04	-6.37
	ΔTH3-3	-9.73	-10.98	-7.89	-7.27	-8.36	-10.02	-10.19	-10.18	-10.83	-10.08	-9.38	-9.17	-8.1	-10.4	-8.93	-7.04	-6.86	-6.95	-6.59
	STDEV	1.03958	1.40761	0.528861	0.537424	0.575198	1.10576	0.848117	0.847821	1.23597	0.988257	0.712714	0.497418	0.757151	1.13037	0.438463	0.527165	0.65839	0.425415	0.628271
	S.E.M	0.600204	0.812686	0.305338	0.310282	0.332091	0.638412	0.489661	0.48949	0.713587	0.570571	0.411486	0.287185	0.437141	0.652617	0.253147	0.304359	0.380122	0.245613	0.362733
	Δ(ΔTH1)	0.1	-0.266667	1.48333	1.86667	1.02667	0.536667	-1.14667	-0.703333	-0.606667	-0.116667	0.256667	0.333333	1.91	0.58	0	2.21333	2.59	2.13333	2.89667
	Δ(ΔTH2)	0.526667	0.366667	1.17333	1.85	1.03333	-1.64667	-0.743333	-1.05	0.163333	0.17	0.0466667	0.0133333	1.15333	-0.79	0	1.97333	2.46667	1.76333	2.96
	Δ(ΔTH3)	-0.85	-1.83	1.13667	1.64333	0.736667	-1.11667	-1.58333	-1.58667	-1.70333	-1.06667	-0.436667	0.0333333	0.933333	-1.28667	0	1.88	2.05667	1.96	2.54333
	Mean	-0.0744444	-0.576667	1.26444	1.78667	0.932222	-0.742222	-1.15778	-1.11333	-0.715556	-0.337778	-0.0444444	0.126667	1.33222	-0.498889	0	2.02222	2.37111	1.95222	2.8
	STDEV	0.704717	1.13067	0.190448	0.12441	0.169389	1.13881	0.42011	0.445059	0.938085	0.647305	0.355533	0.179258	0.512319	0.966784	0	0.17196	0.279212	0.185123	0.224524
	S.E.M	0.406868	0.652792	0.109955	0.071828	0.0977967	0.657493	0.242551	0.256955	0.541604	0.373722	0.205267	0.103494	0.295787	0.558173	0	0.0992814	0.161203	0.106881	0.129629
	Fold Δ(ΔTH1)	1.07177	0.831238	2.79594	3.64689	2.03731	1.45062	0.451668	0.614152	0.656712	0.922316	1.19472	1.25992	3.75809	1.49485	1	4.63746	6.02099	4.3873	7.44704
	Fold Δ(ΔTH2)	1.4406	1.28937	2.25532	3.605	2.04675	0.319377	0.597358	0.482968	1.11987	1.12506	1.03288	1.00928	2.22427	0.578344	1	3.92674	5.52765	3.39482	7.78124
	Fold Δ(ΔTH3)	0.554785	0.281265	2.19872	3.12387	1.66632	0.461158	0.33371	0.33294	0.307076	0.477421	0.73884	1.02337	1.90968	0.409897	1	3.68075	4.16024	3.89062	5.82934
	Mean	1.02239	0.800624	2.41666	3.45859	1.91679	0.743717	0.460912	0.476687	0.694553	0.841598	0.98881	1.09753	2.63068	0.827697	1	4.08165	5.23629	3.89091	7.01921
	STDEV	0.444967	0.50475	0.329681	0.290631	0.216967	0.616284	0.132067	0.140711	0.407717	0.331278	0.23111	0.140814	0.988954	0.583877	0	0.496808	0.963983	0.496242	1.04391
	S.E.M	0.256902	0.291417	0.190341	0.167796	0.125266	0.355812	0.0762487	0.0812396	0.235396	0.191263	0.133432	0.081299	0.570973	0.337102	0	0.286832	0.556556	0.286505	0.602703
	%	25.1277	36.3988	7.87621	4.85157	6.53517	47.8423	16.543	17.0426	33.8917	22.7262	13.4942	7.40748	21.7044	40.7277	0	7.02736	10.6288	7.36345	8.58649
	P-value	0.729748	0.119998	1.87763e-07	1.56752e-10	4.43429e-07	0.0553998	8.95853e-05	0.000150889	0.142028	0.112029	0.703578	0.111856	3.20924e-05	0.117351	#DIV/0!	4.43864e-10	3.642e-09	7.41686e-10	1.02044e-09
	Self_P-value			0.000227227		0.00833741								3.08938e-05
